# Supplementary material for: Hybrid poly(3-hexyl thiophene)–TiO2 nanorod oxygen sensor
Source: Royal Society of Chemistry journal article supplement (doi:10.1039/c4ra02058h), 2014-01-01
Supplement: c4ra02058h1.pdf [file c4ra02058h1.pdf]

## Supplementary Information

# Hybrid Poly(3-hexyl thiophene):TiO<sub>2</sub> Nanorods Oxygen Sensor

*Che-Pu Hsu,<sup>†a</sup> Tsung-Wei Zeng,<sup>†a</sup> Ming-Chung Wu,<sup>b</sup>  
Yu-Chieh Tu,<sup>a</sup> Hsueh-Chung Liao,<sup>a</sup> and Wei-Fang Su,<sup>\*a</sup>*

<sup>a</sup> Department of Materials Science and Engineering, National Taiwan University, Taipei 106-17, Taiwan

<sup>b</sup> Department of Chemical and Materials Engineering, Chang Gung University, Taoyuan 333-02,  
Taiwan

<sup>†</sup>These authors contributed equally to the work.

### The response time and recovery time of the oxygen sensor

Herein we used exponential curve to accurately fit the experiment data of Fig. 7 (b) (60°C) and estimate the response time and recovery time of our sensors according to the definitions:

**Response time:** The response time is defined as the time our sensor takes to reach 90% of saturated  $R_0/R$  (steady-state gain value) after the exposure to oxygen gas.

**Recovery time:** The recovery time is defined as the time our sensor takes to reach 20% of the initial  $R_0/R$  values (before exposure to oxygen gas).

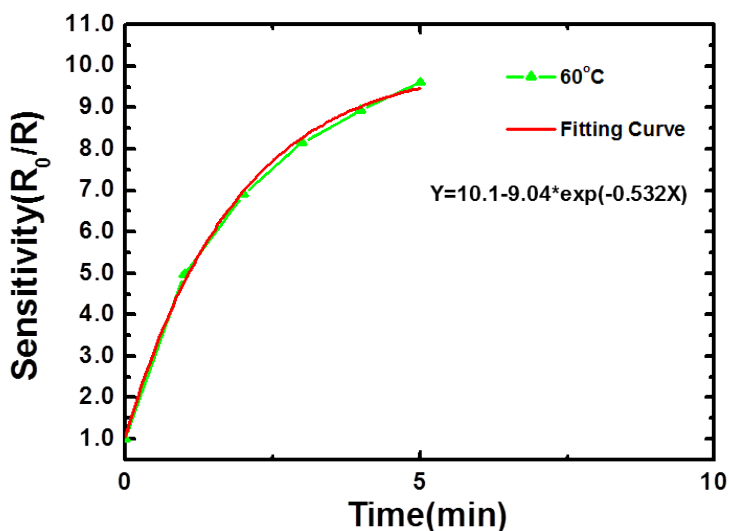

Fig. S1. Sensing responses of P3HT/TiO<sub>2</sub> hybrid film (50wt% TiO<sub>2</sub>) testing at 60°C.

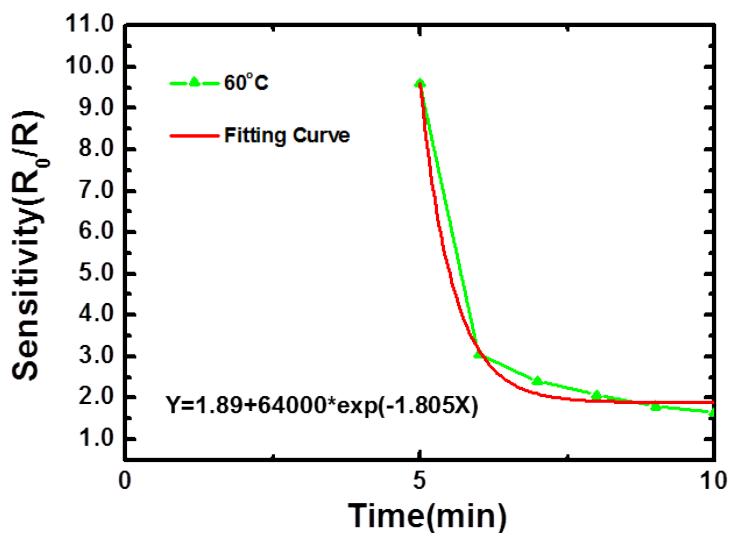

Fig. S2. Sensing recovery of P3HT/TiO<sub>2</sub> hybrid film (50wt% TiO<sub>2</sub>) testing at 60°C.

**Fig. S1** and **S2** present the sensing responses and recovery of P3HT/TiO<sub>2</sub> hybrid film (50wt% TiO<sub>2</sub>) testing at 60°C. The red lines represent the exponential fitting results. According to the formula and the definitions, the response and recovery time can be estimated to be 4.1 and 2.3 minutes respectively.
